# Supplementary material for: Improved performance of flexible dye-sensitized solar cells based on hierarchical TiO2 nanostructures with high surface area
Source: Royal Society of Chemistry journal article supplement (doi:10.1039/c3ra44061c), 2013-01-01
Supplement: c3ra44061c.pdf [file c3ra44061c.pdf]

## Supplementary Information

# Improved performance of flexible dye-sensitized solar cells by hierarchical TiO<sub>2</sub> nanostructures with high surface area

*Bo Chen,<sup>a\*</sup> Grayson Doucette,<sup>b</sup> Shashank Priya<sup>a\*</sup>*

a, Bio-Inspired Materials and Devices Laboratory, Center for Energy Harvesting Materials and System, Virginia Tech, Blacksburg, VA 24061

b, Materials Science and Engineering, Virginia Tech, Blacksburg, VA 24061

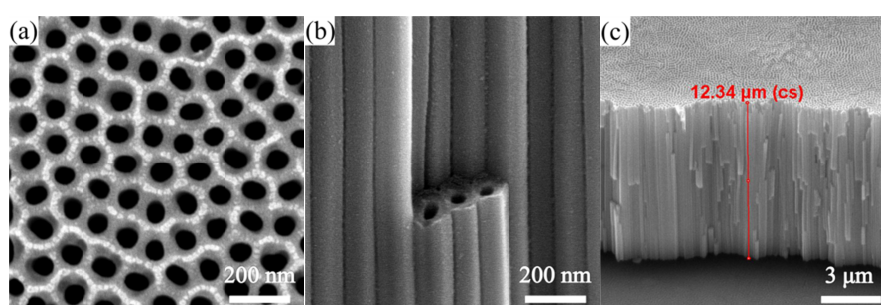

**Fig. S1:** (a) Surface image of as-grown TiO<sub>2</sub> nanotubes with the top porous layer; (b) and (c) profile section image of as-grown TiO<sub>2</sub> nanotubes. The thickness of TiO<sub>2</sub> nanotubular film is ~12 μm, and “cs” represents the cross sectional length after regulating with 52° tilt angle.

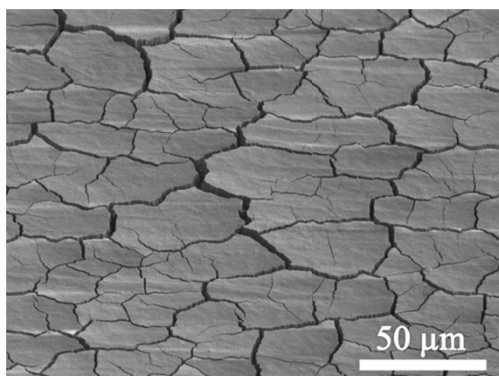

**Fig. S2:** Formation of numerous cracks after 40 min hydrothermal treatment for anodic TiO<sub>2</sub> nanotubes.

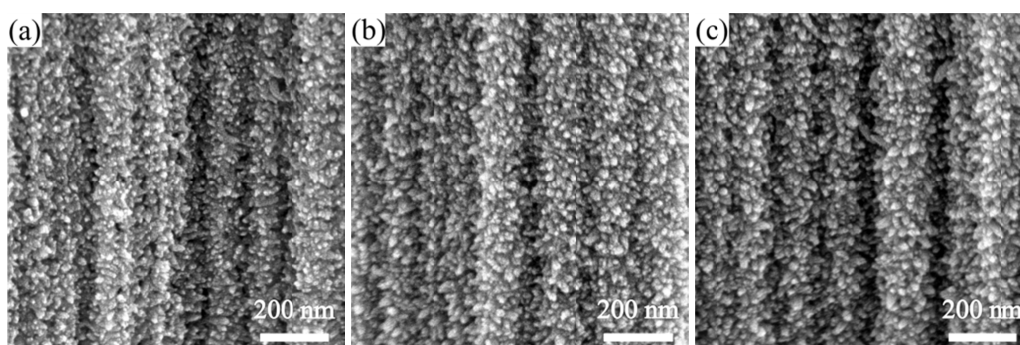

**Fig. S3:** SEM image of the tube outer shell after various hydrothermal treatment times: (a) 15 min, (b) 20 min, and (c) 40 min.

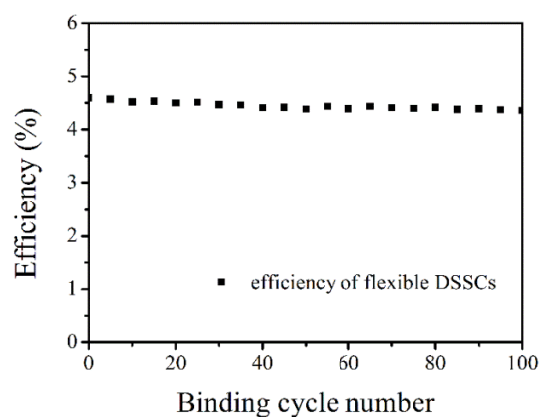

**Fig. S4:** Binding test for the efficiency of flexible DSSCs based on Ti metallic substrate with 20 min hydrothermal treated TiO<sub>2</sub> nanostructures.

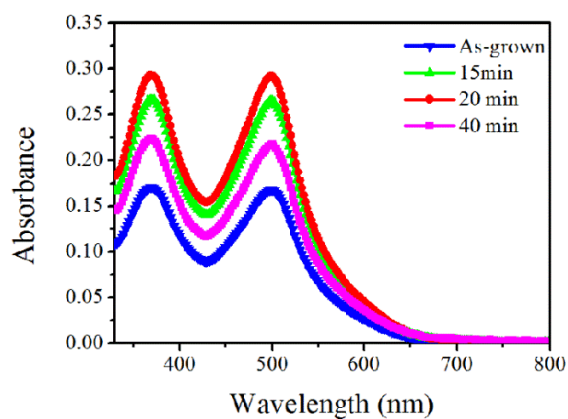

**Fig. S5:** UV-Vis absorption spectra of solutions containing N719 dyes desorbed from photoelectrodes with different hydrothermal treatment times.

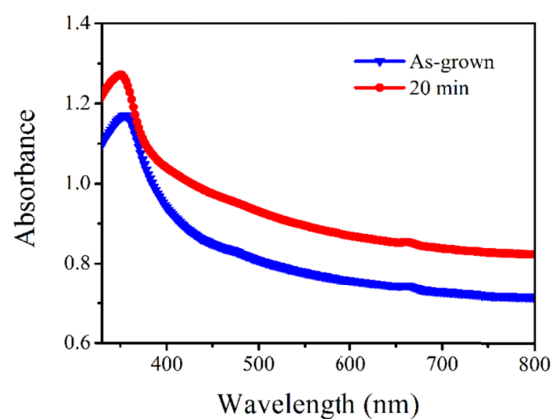

**Fig. S6:** UV-Vis absorbance spectra of as-grown TiO<sub>2</sub> nanotubes and 20 min hydrothermal treated TiO<sub>2</sub> nanostructures. The absorbance spectra were measured on Ti metallic substrate with TiO<sub>2</sub> nanostructures.
